# Supplementary material for: Scaffold hopping from (5-hydroxymethyl) isophthalates to multisubstituted pyrimidines diminishes binding affinity to the C1 domain of protein kinase C
Source: PLoS One. 2018 Apr 11;13(4):e0195668. doi: 10.1371/journal.pone.0195668 (PMC5895059; doi:10.1371/journal.pone.0195668)
Supplement: S1 File — (XLSX) [file pone.0195668.s001.xlsx]

## Sheet: ChemGPS
			PKCα		DIMENSIONS
		COMPOUNDS	Ki	Ref.	PC1	PC2	PC3	PC4	PC5	PC6	PC7	PC8		SMILES
		HMI-1a1		12	1.60131	2.61618	2.60549	0.146594	0.528992	-1.3744	-0.482399	0.81526		OCC1=CC(C(OCC2=CC(C(C)(C)C)=CC=C2)=O)=CC(C(OCC3=CC(C(C)(C)C)=CC=C3)=O)=C1
		HMI-1a2			0.336066	3.48068	1.35487	1.11418	0.09572	-1.16912	-0.089064	1.02848		OCC1=CC(C(OCC2=CC(Cl)=CC=C2)=O)=CC(C(OCC3=CC(Cl)=CC=C3)=O)=C1
		HMI-1a3	205 nM		1.45797	3.23812	1.22917	2.22237	-1.64021	-0.683263	-0.135647	1.42657		OCC1=CC(C(OCC2=CC(C(F)(F)F)=CC=C2)=O)=CC(C(OCC3=CC(C(F)(F)F)=CC=C3)=O)=C1
		HMI-1b1			-0.581804	-0.279297	1.44081	1.30137	0.523765	-2.56466	-0.180418	0.29993		OCC1=CC(C(OCCCCCC)=O)=CC(C(OCCCCCC)=O)=C1
		HMI-1b2			-0.646458	-0.203074	1.32034	1.00759	0.472412	-2.16532	-0.187754	0.241092		OCC1=CC(C(OCC(C)CCC)=O)=CC(C(OCC(C)CCC)=O)=C1
		HMI-1b3			-0.646458	-0.203074	1.32034	1.00759	0.472412	-2.16532	-0.187754	0.241092		OCC1=CC(C(OC[C@H](C)CCC)=O)=CC(C(OC[C@H](C)CCC)=O)=C1
		HMI-1b4			-0.646458	-0.203074	1.32034	1.00759	0.472412	-2.16532	-0.187754	0.241092		OCC1=CC(C(OC[C@@H](C)CCC)=O)=CC(C(OC[C@@H](C)CCC)=O)=C1
		HMI-1b5			-0.646476	-0.207967	1.29812	1.00189	0.477735	-2.1623	-0.178882	0.251957		OCC1=CC(C(OCCC(C)CC)=O)=CC(C(OCCC(C)CC)=O)=C1
		HMI-1b6			-0.646476	-0.207967	1.29812	1.00189	0.477735	-2.1623	-0.178882	0.251957		OCC1=CC(C(OCCCC(C)C)=O)=CC(C(OCCCC(C)C)=O)=C1
		HMI-1b7			0.176288	-0.597516	2.2198	1.16225	0.477361	-2.52366	-0.450364	0.175905		OCC1=CC(C(OCC(CC)CCCC)=O)=CC(C(OCC(CC)CCCC)=O)=C1
		HMI-1b8			0.002476	0.01142	1.50792	-0.19634	-0.02344	-0.477494	-0.021571	0.21781		OCC1=CC(C(OCC2[C@@H](C3)CC[C@@H]3C2)=O)=CC(C(OCC4[C@@H](C5)CC[C@@H]5C4)=O)=C1
		HMI-1b9			-0.383215	0.014145	1.40705	0.150676	0.138542	-0.91493	-0.140968	0.115017		OCC1=CC(C(OCC2CCCCC2)=O)=CC(C(OCC3CCCCC3)=O)=C1
		HMI-1b10			-0.646321	-0.193994	1.36172	1.01817	0.462524	-2.1709	-0.204255	0.22089		OCC1=CC(C(OC(CC)CCC)=O)=CC(C(OC(CC)CCC)=O)=C1
		HMI-1b11	319 nM		-0.238388	-0.392311	1.84461	1.06114	0.505393	-2.351	-0.334514	0.191906		OCC1=CC(C(OC(CC)CCCC)=O)=CC(C(OC(CC)CCCC)=O)=C1
		HMI-1b12			-0.646339	-0.198888	1.3395	1.01248	0.467847	-2.16789	-0.195383	0.231755		OCC1=CC(C(OC(C)CCCC)=O)=CC(C(OC(C)CCCC)=O)=C1
		HMI-1b13			-0.238407	-0.397205	1.82239	1.05544	0.510716	-2.34798	-0.325641	0.202771		OCC1=CC(C(OC(C)CCCCC)=O)=CC(C(OC(C)CCCCC)=O)=C1
		HMI-1b14			0.657016	-0.140324	2.27804	-0.655114	-0.156404	0.015544	-0.368042	-0.056737		OCC1=CC(C(OC2C(CCCC3)C3CCC2)=O)=CC(C(OC4C(CCCC5)C5CCC4)=O)=C1
		HMI-1b15			0.392166	0.024854	2.15305	-0.530732	-0.181901	-0.007515	-0.268396	-0.063817		OCC1=CC(C(OC2[C@@](CCCC3)([H])[C@@]3([H])CCC2)=O)=CC(C(OC4[C@@](CCCC5)([H])[C@@]5([H])CCC4)=O)=C1
		HMI-1b16			0.804328	3.25491	1.72253	-0.253096	0.34422	-0.551477	-0.046733	0.94572		OCC1=CC(C(O[C@H]2C(C=CC=C3)=C3CC2)=O)=CC(C(O[C@H]4C(C=CC=C5)=C5CC4)=O)=C1
		HMI-1b17			-0.151846	-0.539162	-0.202912	1.17669	0.445363	-2.89201	0.021999	0.813054		OCC1=CC(C(OCCCCCO)=O)=CC(C(OCCCCCO)=O)=C1
		HMI-1b18			-0.697895	0.108954	-0.001322	0.432269	0.114819	-1.09982	0.47847	0.439929		OCC1=CC(C(OCC2COCC2)=O)=CC(C(OCC3CCOC3)=O)=C1
		HMI-1b19			-0.745078	-0.211189	0.130611	1.45505	0.451218	-2.566	0.390937	0.577338		OCC1=CC(C(OCCCOCC)=O)=CC(C(OCCCOC)=O)=C1
		HMI-1b20			-2.65226	1.11535	-2.13954	0.521842	0.184353	-0.99691	0.352142	0.844665		OCC1=CC(C(O)=O)=CC(C(O)=O)=C1
		HMI-1b21			-2.23038	0.618582	-0.408896	0.929958	0.511041	-1.69468	0.347225	0.49039		OCC1=CC(C(OCC)=O)=CC(C(OCC)=O)=C1
		HMI-15e			1.68235	3.4708	1.21145	2.8822	-1.44755	-0.402671	0.56965	1.00439		[O-][N+](C1=CC(C(OCC2=CC(C(F)(F)F)=CC=C2)=O)=CC(C(OCC3=CC(C(F)(F)F)=CC=C3)=O)=C1)=O
		HMI-22c			-2.30901	0.402523	0.576202	0.562838	0.676566	-1.85552	-0.390915	0.49629		OCC1=CC(C(OC(CC)CCCC)=O)=CC=C1
		HMI-24a			1.83545	3.06067	0.538916	2.22405	-0.471981	0.301246	-1.03865	1.39841		OCC1=CC(C(NCC2=CC(C(F)(F)F)=CC=C2)=O)=CC(C(NCC3=CC(C(F)(F)F)=CC=C3)=O)=C1
		1a			-0.15722	-0.819772	1.33428	1.77444	0.867087	-2.42891	-0.153437	0.376948		OCC1=NC(C(OCCCCCCC)=O)=CC(C(OCCCCCCC)=O)=N1
		1b			0.255456	-1.01087	1.74832	1.8646	0.823464	-2.57523	-0.287822	0.336331		OCC1=NC(C(OCCCCCCCC)=O)=CC(C(OCCCCCCCC)=O)=N1
		1c			1.92203	-1.56072	3.01766	2.20805	0.259276	-2.98633	-0.285802	0.948142		OCC1=NC(C(OCCCCCCCCCCC)=O)=CC(C(OCCCCCCCCCCC)=O)=N1
		1d			-1.2159	-0.289499	0.174409	1.41494	0.866583	-1.81397	0.147166	0.435295		OCC1=NC(C(OC(CC)CCCC)=O)=CC(C(OCC)=O)=N1
		1e			-0.220437	-0.738181	1.25757	1.50743	0.81	-2.05903	-0.175371	0.301326		OCC1=NC(C(OC(CC)CCCC)=O)=CC(C(OC(CC)CCCC)=O)=N1
		1f			0.193548	-0.932953	1.67417	1.61383	0.770493	-2.22924	-0.307918	0.264046		OCC1=NC(C(OC(CC)CCCCC)=O)=CC(C(OC(CC)CCCCC)=O)=N1
		1g			1.03418	2.95566	0.665208	2.53806	-0.846988	-0.294321	-0.332869	0.838118		OCC1=NC(C(OCC2=CC=CC(C(F)(F)F)=C2)=O)=CC(C(OCC3=CC(C(F)(F)F)=CC=C3)=O)=N1
		1h			-2.20283	0.293427	-1.0663	1.49786	0.73049	-1.40778	0.53454	0.602788		OCC1=NC(C(OCC)=O)=CC(C(OCC)=O)=N1
		2a			-0.843164	-0.642258	1.12741	1.41067	0.800357	-2.14106	-0.487249	0.442917		CC1=C(C(OCCCCCC)=O)N=C(CO)N=C1OCCCCCC
		2b			-0.436652	-0.839596	1.6094	1.44282	0.83972	-2.30495	-0.617748	0.410313		CC1=C(C(OCCCCCCC)=O)N=C(CO)N=C1OCCCCCCC
		2c			-0.025165	-1.00379	2.02035	1.56477	0.786263	-2.4261	-0.722001	0.379444		CC1=C(C(OCCCCCCCC)=O)N=C(CO)N=C1OCCCCCCCC
		2d			-0.087211	-0.934988	1.90466	1.30337	0.74322	-2.0745	-0.72553	0.327441		CC1=C(C(OCC(CCC)CCC)=O)N=C(CO)N=C1OCC(CCC)CCC
		2e			-0.499865	-0.758005	1.5327	1.17581	0.782633	-1.93506	-0.639682	0.334691		OCC1=NC(C(OC(CC)CCCC)=O)=C(C)C(OC(CC)CCCC)=N1
		2f			1.20374	2.9084	0.919457	2.31985	-1.35227	-0.241527	-0.423445	1.58285		OCC1=NC(C(OCC2=CC(C(F)(F)F)=CC=C2)=O)=C(C)C(OCC3=CC(C(F)(F)F)=CC=C3)=N1
		2g			-1.06007	1.8822	-0.166455	1.58373	-0.102109	-0.443128	-0.26968	0.829149		OCC1=NC(C(OC)=O)=C(C)C(OCC2=CC(C(F)(F)F)=CC=C2)=N1
		2h			0.146423	1.14314	1.27951	1.65105	0.050329	-1.11852	-0.716963	0.658179		OCC1=NC(C(OC(CC)CCCC)=O)=C(C)C(OCC2=CC(C(F)(F)F)=CC=C2)=N1
		2i			-0.468259	-0.798783	1.57113	1.30934	0.811157	-2.12001	-0.628748	0.372462		OCC1=NC(C(OC(CC)CCCC)=O)=C(C)C(OCCCCCCC)=N1
		2j			0.17846	1.10109	1.31858	1.78994	0.080277	-1.31141	-0.705329	0.697169		OCC1=NC(C(OCC2=CC(C(F)(F)F)=CC=C2)=O)=C(C)C(OCCCCCCC)=N1
		2k			-1.69987	-0.167847	0.18191	1.06606	0.759533	-1.51506	-0.255467	0.475784		OCC1=NC(C(OC)=O)=C(C)C(OC(CC)CCCC)=N1
		2l			0.146423	1.14314	1.27951	1.65105	0.050329	-1.11852	-0.716963	0.658179		OCC1=NC(C(OCC2=CC(C(F)(F)F)=CC=C2)=O)=C(C)C(OC(CC)CCCC)=N1
		Bryostatin-1	1.35 nM	33	7.37128	-3.27167	1.6531	-0.082614	-0.999879	0.157872	2.10326	-0.010173		CC1(C)[C@@H](OC(C)=O)C[C@@H](C[C@@H](O)CC(O[C@@H]([C@H](O)C)C[C@H]2O[C@](C(C)(C)/C=C/3)(O)[C@@H](OC(/C=C/C=C/CCC)=O)/C(C2)=C/C(OC)=O)=O)OC1(O)C[C@H](C/4)O[C@@H]3CC4=C/C(OC)=O
		Bryostatin-18	4.8 nM	34	5.84912	-3.03946	1.07616	-0.689568	-1.21233	0.460403	1.32196	0.207432		C[C@H]([C@H]1C[C@@H]2C/C(=C/C(=O)OC)/C[C@@](O2)(C(/C=C/[C@H]3C/C(=C\C(=O)OC)/C[C@H](O3)C[C@]4(C([C@H](C[C@H](O4)C[C@H](CC(=O)O1)O)OC(=O)C(C)(C)C)(C)C)O)(C)C)O)O
		Phorbol 13-acetate	120 µM	39	-0.025107	-1.73903	-1.12593	-1.11087	-0.284049	0.546606	0.497042	0.056676		C[C@@H]1[C@H]([C@@]2([C@@H](C2(C)C)[C@H]3[C@]1([C@@H]4C=C(C(=O)[C@]4(CC(=C3)CO)O)C)O)OC(=O)C)O
		Phorbol 12-myristate-13-acetate	2 nM	39	3.37256	-2.81907	2.12114	0.212702	-0.658567	-1.00215	0.515914	0.516868		CCCCCCCCCCCCCC(=O)O[C@@H]1[C@H]([C@]2([C@@H](C=C(C[C@]3([C@H]2C=C(C3=O)C)O)CO)[C@H]4[C@@]1(C4(C)C)OC(=O)C)O)C
		Phorbol 12,13-dibutyrate	0.3 nM	37	1.28009	-2.10516	0.446518	-0.400847	-0.131764	-0.168856	0.632893	-0.180334		CCCC(=O)O[C@@H]1[C@H]([C@]2([C@@H](C=C(C[C@]3([C@H]2C=C(C3=O)C)O)CO)[C@H]4[C@@]1(C4(C)C)OC(=O)CCC)O)C
		(E)-DAG-lactone 31	2.7 nM	16	-0.459846	-2.12247	1.69605	0.514833	0.148767	-1.30025	-0.248121	-0.542087		O=C1/C(C[C@](COC(CC(C(C)C)C(C)C)=O)(CO)O1)=C\CC(C(C)C)C(C)C
		(Z)-DAG-lactone 9	11 nM	35	-1.22828	-1.88826	1.00365	0.453872	0.255488	-1.28643	-0.039375	-0.500372		O=C1/C(C[C@](COC(CC(C)C)=O)(CO)O1)=C\CC(C(C)C)C(C)C
		Iripallidal	75.6 nM	38	0.97474	-2.31246	1.86827	-0.275582	0.225782	-0.521821	-0.169953	-0.367501		C/C(C=O)=C1[C@@H](CCCO)[C@](CO)(CC/C=C(/C=C/[C@@H]2C(C)=CC[C@H](C)C2(C)C)C)[C@@](C)(O)CC/1
		Ingenol 3-angelate	0.1 nM	37	0.179869	-1.65611	0.14546	-0.854757	-0.099036	0.543653	0.57319	-0.288863		C/C=C(/C)\C(=O)O[C@H]1C(=C[C@@]23[C@@]1([C@@H](C(=C[C@@H](C2=O)[C@H]4[C@H](C4(C)C)C[C@H]3C)CO)O)O)C
		Prostratin	4.83 nM	36	-0.333244	-1.61034	-0.352296	-1.0452	-0.176838	0.611126	0.435359	-0.165204		OCC1=C[C@](C2(C)[C@](OC(C)=O)(C2(C)C)C[C@H]3C)([H])[C@@]3(O)[C@@](C=C(C)C4=O)([H])[C@]4(O)C1
		Mezerein	0.27 nM	36	4.04129	0.859053	1.52666	-0.919898	-0.264698	0.499878	0.993747	0.416606		C[C@@H]1[C@H]([C@]2([C@H]3[C@H]4[C@]1([C@@H]5C=C(C(=O)[C@]5([C@@H]([C@@]6([C@H]4O6)CO)O)O)C)O[C@](O3)(O2)C7=CC=CC=C7)C(=C)C)OC(=O)/C=C/C=C/C8=CC=CC=C8
		9-Decyl-benzolactam-V8	3.8 nM	32	-0.04486	-0.433252	1.57889	0.448393	1.12411	-1.02275	-1.44533	0.188229		CC(C)[C@H](N1)C(N[C@H](CO)CC2=C1C=C(CCCCCCCCCC)C=C2)=O
		Indolactam-V	11 nM	36	-1.19671	1.32485	-0.267691	-0.300754	1.3206	0.603916	-0.896892	0.66605		CC(C)C1C(=O)NC(CC2=CNC3=C2C(=CC=C3)N1C)CO
