# Supplementary material for: Scaffold hopping from (5-hydroxymethyl) isophthalates to multisubstituted pyrimidines diminishes binding affinity to the C1 domain of protein kinase C
Source: PLoS One. 2018 Apr 11;13(4):e0195668. doi: 10.1371/journal.pone.0195668 (PMC5895059; doi:10.1371/journal.pone.0195668)
Supplement: S2 File — (XLSX) [file pone.0195668.s002.xlsx]

## Sheet: Sheet1
Displacement assay raw data (CCPM)
	1a						1b						1c						1d						1e						1f						1g						1h
	0,2 µM	1 µM	4 µM	10 µM	20 µM	30 µM	0,2 µM	1 µM	4 µM	10 µM	20 µM	30 µM	0,2 µM	1 µM	4 µM	10 µM	20 µM	30 µM	0,2 µM	1 µM	4 µM	10 µM	20 µM	30 µM	0,2 µM	1 µM	4 µM	10 µM	20 µM	30 µM	0,2 µM	1 µM	4 µM	10 µM	20 µM	30 µM	0,2 µM	1 µM	4 µM	10 µM	20 µM	30 µM	0,2 µM	1 µM	4 µM	10 µM	20 µM	30 µM
	8472	8836	8165	8577	7960	7857	1215	1213	1201	1222	1194	1407	9009	8410	7927	8364	9322	8399	11839	11705	11573	12001	11664	12337	9796	9629	9023	8845	9742	8529	7761	8004	8110	7306	7065	7070	11409	12142	11774	11639	11874	11016	10230	9840	9299	9686	9294	9318
	8055	8480	8077	7653	7787	7587	1126	1392	1408	1214	1172	1081	9090	8950	8172	8092	8225	9539	10949	12203	11709	12205	11365	11581	9740	9242	9333	9519	7884	8458	8223	8035	8243	7650	7340	7370	12180	12212	11597	11927	12244	11803	10470	9837	9482	9902	10766	10014
	9131	8743	7980	8759	7605	7587	1107	1115	1101	1251	1054	1070	8135	7374	8779	7968	7670	7089	11567	11600	11091	11408	11482	11144	9577	9347	9667	8799	7727	9304	8395	8430	8187	6268	7244	7174	12791	11135	12149	11310	12079	12038	11100	10294	9928	9890	9965	8246
	5172	5670	5413	5036	5228	5013	7956	7562	7673	7474	8891	6691	9009	8410	7927	8364	9322	8399	6093	5961	5210	5899	5575	5029	6148	6081	6505	5785	6291	5635	7761	8004	8110	7306	7065	7070	7834	5159	8091	6008	8018	5730	5792	5441	5323	6355	5572	4984
	4908	5038	5275	5595	4729	5317	7520	7593	7303	6957	9450	6936	9090	8950	8172	8092	8225	9539	6313	363*	6475	5461	5277	5100	6500	6166	6158	5946	6049	5882	8223	8035	8243	7650	7340	7370	6792	5208	7399	6638	7727	6258	6513	6766	5809	6092	5876	6346
	5564	5111	5090	5789	4889	4835	7480	7638	7531	7793	8435	6677	8135	7374	8779	7968	7670	7089	5785	5593	5222	5570	5518	5500	5837	5874	6376	5476	5873	5476	8395	8430	8187	6268	7244	7174	5983	5197	7023	6399	7300	6005	6323	5802	5407	6198	6120	5421
	2a						2b						2c						2d						2e						2f						2g						2h						2i
	0,2 µM	1 µM	4 µM	10 µM	20 µM	30 µM	0,2 µM	1 µM	4 µM	10 µM	20 µM	30 µM	0,2 µM	1 µM	4 µM	10 µM	20 µM	30 µM	0,2 µM	1 µM	4 µM	10 µM	20 µM	30 µM	0,2 µM	1 µM	4 µM	10 µM	20 µM	30 µM	0,2 µM	1 µM	4 µM	10 µM	20 µM	30 µM	0,2 µM	1 µM	4 µM	10 µM	20 µM	30 µM	0,2 µM	1 µM	4 µM	10 µM	20 µM	30 µM	0,2 µM
	7949	7626	7496	7467	6283	6598	13052	11258	10048	10753	9620	9760	12223	12118	10666	10483	10634	11684	9740	7644	7518	7586	7408	8520	13386	12486	13244	12416	11475	11584	5892	5789	5908	5951	5509	5249	5444	5331	5858	6071	5096	5416	5892	5789	5908	5951	5509	5249	4873
	9699	8685	8524	7915	8361	7105	11682	11582	11019	10221	9492	10346	10832	12391	10448	10217	9873	11210	9459	9362	9016	7877	8501	7381	12773	13520	12192	12269	10474	10772	5535	5065	5351	5634	4316	4747	5572	5641	5969	6111	6099	5047	5535	5065	5351	5634	4316	4747	4870
	8544	9639	9257	7828	8257	7428	11827	12305	11674	10149	9656	10712	10701	11284	9501	10554	9750	10063	9651	9109	8738	7985	8368	8758	11586	13561	13129	12041	10581	11119	6214	5775	5505	5541	5047	5046	6419	6328	5764	6173	5970	5574	6214	5775	5505	5541	5047	5046	5222
	12898	11993	11421	11547	10077	10040	17977	17512	17585	14691	14771	16581	18273	18079	18957	15009	16572	15855	5569	5694	4914	4832	4542	5782	9937	10438	11362	10898	9805	8897	6493	6129	4754	5247	4822	4792	5626	5502	5341	5469	5477	5225	5732	5836	5457	4751	4061	3715	7916
	11646	12245	11194	11263	11544	10575	18315	18998	17180	16431	14660	14486	16005	16200	15769	15224	15241	15398	5686	5798	5158	5595	5847	4556	11273	10771	12373	11193	9920	9568	5681	5689	5387	5397	4931	4631	5372	5786	5546	6077	5384	5482	5572	5313	5305	4877	4136	4141	8966
	12786	12903	11877	11635	10260	9972	17029	18500	19863	16220	15872	14880	17696	17048	16408	15278	16254	15526	5559	6238	5369	4913	5492	4977	11368	10331	12221	10978	10092	9434	5606	5775	5468	4899	4834	4673	5082	5467	5465	5316	5474	5411	5002	4792	4736	4485	4187	3683	8933
			DMSO		HMI-1a3								PMA						PMA
					0,2 µM	1 µM	4 µM	10 µM	20 µM	30 µM			1 µM						1 nM	10 nM	100 nM	1 µM
			10044		7947	8316	8069	5942	4416	4126			282						1177	406	341	346
			8453		10118	10375	8861	6974	4690	4410			395						1302	456	382	322
			6307		9201	9369	8988	7041	4133	4306			317						1254	410	361	471
			11999		10573	11849	10230	7809	6375	5377			267						242	123	56	49
			12304		13369	13248	10479	8146	6672	5618			282						282	132	49	44
			10948		11909	11754	10254	7326	6358	5510			229						239	132	43	54
			15221		19065	18495	17238	13473	9003	6623			18532*						330	186	48	41
			17176		18020	17730	15756	13008	9712	8804			15713*						372	230	57	43
			15122		15153	17791	16256	15549	9133	8882			16364*						364	206	40	52
			9071		7015	6815	6318	5331	3220	3553			341
			10199		8679	8354	6211	5608	3988	3557			360
			9300		9118	8506	6759	6100	4705	3896			339
			8925		10301	9259	8736	8040	5433	4796			411
			13407		12878	11768	11187	8239	6582	5194			399
			12951		12619	11212	9847	10764	5927	6061			373
			11060		11724	11219	11319	8126	5415	5299			496
			11577		12654	12279	10499	10505	5977	5877			498
			10288		10989	11033	8652	7756	6272	5543			382
			4828		6191	5723	5621	4357	3200	2342			343
			5630		7172	5973	5890	5171	3376	3112			403
			5301		5802	5634	5566	4638	3154	2893			387
			4828		6191	5723	5621	4357	3200	2342			343
			5630		7172	5973	5890	5171	3376	3112			403
			5301		5802	5634	5566	4638	3154	2893			387
			8918		9779	9458	7694	6580	4721	3986			329
			10960		9693	9955	9727	6169	4391	4454			326
			12237		10615	9587	7897	6618	4466	3814			320
			5580		7362	6343	4932	4130	2754	2774			414
			6989		7782	6530	5282	5085	2922	3631			406
			6726		5599	5705	5498	5753	3473	2586			418
			5791					4053		3323			319
			5778					4505		2979			327
			5267					4975		3086			307
			5372			5828		4687		2448			376
			5492			6037		4650		2990			351
			4782			5300		4715		2873			424
			1175		1166	1168	1082	923	776	737			320
			1118		1158	1238	1402	1002	872	764			315
			1115		1134	1136	1188	1026	824	825			340
			8123		7291	5953	5199	3585	3430	6783			456
			8283		7433	6393	5591	4169	3474	8657			476
			8109		7348	7058	5572	4066	3540	8807			503
			8194		7480	8027	7146	6519	5197	4390			715
			8335		9007	8338	7841	7592	5140	4637			622
			8358		8162	7982	7642	6594	5378	4545			587
			8194		7480	8027	7146	6519	5197	4390			715
			8335		9007	8338	7841	7592	5140	4637			622
			8358		8162	7982	7642	6594	5378	4545			587
			4953			5326		4753		2968			218
			5512			5187		4789		2402			221
			5266			5193		4236		2807			157
			5302			5619		5091		3377			199
			5360			5305		4317		4004			181
			5555			5564		4316		3081			193
			8913			8597		7778		4816			1265
			8901			9056		8254		5016			807
			8938			8313		6277		4447			767
			10748			10514		8407		5717			848
			12571			11290		8638		6081			993
			11456			10555		8216		6014			1003
[truncated: 23 more columns]
